# Supplementary material for: Conditional abrogation of Atm in osteoclasts extends osteoclast lifespan and results in reduced bone mass
Source: PubMed Central journal article supplement (PMC5039636; doi:10.1038/srep34426), 2016-09-28
Supplement: srep34426-s1.pdf [file srep34426-s1.pdf]

Supplementary Information

**Conditional abrogation of *Atm* in osteoclasts extends osteoclast lifespan and results in reduced bone mass**

Toru Hirozane<sup>1,2</sup>, Takahide Tohmonda<sup>1,3</sup>, Masaki Yoda<sup>1,3</sup>, Masayuki Shimoda<sup>4</sup>, Yae Kanai<sup>4</sup>,  
Morio Matsumoto<sup>1</sup>, Hideo Morioka<sup>1</sup>, Masaya Nakamura<sup>1</sup>, and Keisuke Horiuchi<sup>1,3</sup>

<sup>1</sup>Department of Orthopedic Surgery, Keio University School of Medicine, Tokyo 160-8582, Japan, <sup>2</sup>Japan Society for the Promotion of Science, Tokyo 102-8472, Japan, <sup>3</sup>Department of Anti-Aging Orthopedic Research, Keio University School of Medicine, Tokyo, Japan, <sup>4</sup>Department of Pathology, Keio University School of Medicine, Tokyo 160-8582, Japan

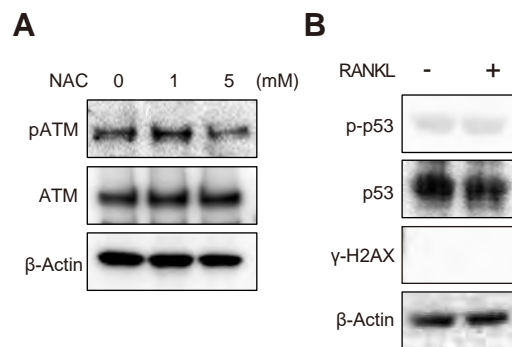

**Supplementary Figure 1.** ATM activation in mature osteoclasts is partly dependent on ROS production. (A) Immunoblots of phosphorylated-ATM (p-ATM) and total ATM in osteoclasts treated with N-acetyl cysteine (NAC; 0, 1, and 5 mM) for 6h. Immunoblots for β-actin were used as loading controls. (B) Western blots showing phosphorylated-p53 (p-p53), total p53, and γ-H2AX in BMMs incubated with (+) or without (-) sRANKL for 5 d.

### Supplemental Table 1

List of oligonucleotides used for quantitative PCR analysis

| Gene           | Strand | Sequence                     |
|----------------|--------|------------------------------|
| <i>Atm</i>     | Fwd    | CGTGATGACCTGAGGCAAGA         |
|                | Rev    | GCTGAGAAAGGGGAACCACC         |
| <i>Il1a</i>    | Fwd    | CGAAGACTACAGTTCTGCCATT       |
|                | Rev    | GACGTTTCAGAGGTTCTCAGAG       |
| <i>Bcl2</i>    | Fwd    | ATGCCTTTGTGGA ACTATATGGC     |
|                | Rev    | GGTATGCACCCAGAGTGATGC        |
| <i>Bcl2l1</i>  | Fwd    | GCTGGGACACTTTTGTGGAT         |
|                | Rev    | TGTCTGGTCACTTCCGACTG         |
| <i>Nfatc1</i>  | Fwd    | AACGCCCTGCTGACCACCGATAGCA    |
|                | Rev    | CCCGGGTGCCTTCCGTCTCATA       |
| <i>Fos</i>     | Fwd    | CCAAGCGGAGACAGATCAACTT       |
|                | Rev    | TCCAGTTTTTCCTTCTCTTTCAGCAGAT |
| <i>Acp5</i>    | Fwd    | CCAATGCCAAAGAGATCGCC         |
|                | Rev    | TCTGTGCAGAGACGTTGCCAAG       |
| <i>Dcstamp</i> | Fwd    | TCCTCCATGAACAAACAGTTCCAA     |
|                | Rev    | AGACGTGGTTTAGGAATGCAGCTC     |
| <i>Gapdh</i>   | Fwd    | TCAACAGCAACTCCC ACTCTTCC     |
|                | Rev    | ACCCTGTTGCTGTAGCCGTATTC      |
